# Supplementary material for: Genome-Wide Characterization of RNA Editing Sites in Primary Gastric Adenocarcinoma through RNA-seq Data Analysis
Source: Int J Genomics. 2020 Dec 18;2020:6493963. doi: 10.1155/2020/6493963 (PMC7768588; doi:10.1155/2020/6493963)
Supplement: Supplementary 1 — Summary of the statistics of raw and clean reads and mapping information. [file 6493963.f1.txt]

Samples	All reads	After Trimming	Aligned concordantly 0 times	Aligned concordantly exactly 1 time	Aligned concordantly >1 times	All detected variants	Known SNPs	INDELs	Potential RNA editing	Known RNA editing sites	Novel RNA editing sites
patient1-normal	89404808	85515598	18928782	52295978	14290838	72119	61637	3353	7129	1563	76
patient2-normal	109905991	106002310	17533347	83892317	4576646	100083	84411	4843	10829	3327	57
patient3-normal	103749160	99770373	17212353	78888337	3669683	91602	76975	4604	10023	3001	52
patient4-normal	117945921	95025083	11482135	64034356	19508592	76928	65617	3746	7565	1724	66
patient5-normal	129275089	101324449	8731024	59947867	32645558	81189	70308	3649	7232	1557	84
patient6-normal	128285049	103202565	10210554	78862636	14129375	105614	89371	4938	11305	3051	105
patient7-normal	135086881	108536294	9940318	87366891	11229085	92915	78431	4444	10040	2717	107
patient8-normal	113121244	93095646	9215144	75170752	8709750	90128	76874	4189	9065	2434	109
patient1-cancer	115133865	110839887	25236424	81730190	3873273	85255	71921	4278	9056	2426	99
patient2-cancer	121935949	117395880	25387534	87508794	4499552	93415	79023	4794	9598	2472	72
patient3-cancer	114821200	109865244	23340307	82649724	3875213	88916	74552	4662	9702	2795	103
patient4-cancer	94995659	77661124	6219594	65335434	6106096	92337	77832	4302	10203	2668	63
patient5-cancer	96421484	76733667	7363282	57857691	11512694	70961	59881	3399	7681	1745	56
patient6-cancer	83854974	67437060	5283516	54958231	7195313	88075	75000	4158	8917	2214	67
patient7-cancer	84372390	67999836	6169455	41408677	20421704	68947	59999	3082	5866	1253	41
patient8-cancer	87063640	71676195	5354519	57652519	8669157	72018	61457	3425	7136	1842	92
