# Supplementary material for: Genome-Wide Characterization of RNA Editing Sites in Primary Gastric Adenocarcinoma through RNA-seq Data Analysis
Source: Int J Genomics. 2020 Dec 18;2020:6493963. doi: 10.1155/2020/6493963 (PMC7768588; doi:10.1155/2020/6493963)
Supplement: Supplementary 2 — Editing rate for each chromosome. [file 6493963.f2.txt]

Chromosome	No. of editing sites	Chromosome length (bp)	Editing rate	No. Of editing per Kb
1	1405	248956422	177193.1829	177
2	906	242193529	267321.7759	267
3	617	198295559	321386.6434	321
4	390	190214555	487729.6282	488
5	383	181538259	473990.2324	474
6	509	170805979	335571.668	336
7	678	159345973	235023.559	235
8	385	145138636	376983.4701	377
9	410	138394717	337548.0902	338
10	378	133797422	353961.4339	354
11	567	135086622	238248.0106	238
12	636	133275309	209552.3726	210
13	136	114364328	840914.1765	841
14	345	107043718	310271.6464	310
15	432	101991189	236090.7153	236
16	670	90338345	134833.3507	135
17	741	83257441	112358.22	112
18	110	80373285	730666.2273	731
19	1466	58617616	39984.73124	40
20	375	64444167	171851.112	172
21	92	46709983	507717.2065	508
22	308	50818468	164995.026	165
X	422	156040895	369765.154	370
Y	1	57227415	57227415	57227
