# Supplementary material for: Genome-Wide Characterization of RNA Editing Sites in Primary Gastric Adenocarcinoma through RNA-seq Data Analysis
Source: Int J Genomics. 2020 Dec 18;2020:6493963. doi: 10.1155/2020/6493963 (PMC7768588; doi:10.1155/2020/6493963)
Supplement: Supplementary 3 — List of editing events with recoding impact. [file 6493963.f3.txt]

Chromosome	Position(s)	Gene_name	AA change	Status
1	32673502	RBBP4	N178S	Known
1	62162857	PATJ	K1147R	Known
1	89020203	GBP3	T67A	Known
1	160332454	COPA	I164V	Known
1	246885532	AHCTF1	N883S	Novel
1	247100415	ZNF669	N452D	Known
1	100024651;100024719;100024747;100024736	SLC35A3	T254A;K280R;S286G;S286G	Known
2	89100020	IGKV1-16	K64E	Known
2	90115272	IGKV3D-15	I73V	Known
2	200885271	PPIL3	S59G	Known
2	227686163	SLC19A3	N89S	Known
2	241324457	SEPT2	S20G	Known
2	89319777;89319822;89319819	IGKV1-39	K67E;S52G;S53G	Known
3	9818575	TTLL3	S194G	Known
3	9981710	EMC3	I65V	Known
3	62438132	CADPS	E1250G	Known
3	195780295;195783902	MUC4	L3762P;S2560P	Novel
3	49360990;49360961;49360951;49360949	RHOA	K162R;S172G;Y175C;R176G	Known
3	58156074;58156064	FLNB	Q2327R;M2324V	Known-Novel
4	2228431	HAUS3	R484G	Known
4	2938299	NOP14	I779V	Known
4	157360142	GRIA2	R717G	Known
6	42126804	C6orf132	M98V	Known
6	44152612	TMEM63B	Q619R	Known
6	101889814;101924714;101889827	GRIK2	I567V;Q621R;Y571C	Known
7	39950949	CDK13	Q103R	Known
7	100958135	MUC3A	M2119T	Novel
7	131510316	PODXL	H241R	Known
7	142529491	TRBV7-9	N26D	Novel
7	56078974;56079014	SUMF2	T292A;Q305R	Known
8	102829408	AZIN1	S367G	Known
10	121962096	NSMCE4A	T286A	Known
10	95387072;95387064	SORBS1	T449A;I451M	Known
11	1018295	MUC6	I1502M	Novel
11	62876807	SLC3A2	S77G	Known
11	66756433	C11orf80	S84G	Known
11	130914721	SNX19	S407G	Novel
12	4912576	KCNA1	I400V	Known
12	132862363	CHFR	T156A	Known
13	45516236	COG3	I635V	Known
14	67592364	PIGH	R144G	Known
14	105939874	IGHV6-1	D82G	Known
14	106557006	IGHV3-49	K97E	Known
15	75353745	NEIL1	K242R	Known
15	63911156;63911119	DAPK2	T33A;Q45R	Known
16	23709254	ERN2	Y108C	Known
16	88660818	MVD	S32G	Known
16	89687689;89687615;89687638	CDK10	Q63R;M26V;Q46R	Known
17	2333110	TSR1	S386G	Novel
17	31856838	COPRS	S43G	Novel
19	1475514	C19orf25	E44G	Known
19	19177395	BORCS8	Q55R	Known
19	19786831	ZNF506	I84V	Known
19	32971605	CEP89	I30M	Known
19	57844321	ZNF587B	I396M	Known
19	46338233;46338281	HIF3A	H427R;Q443R	Known
20	5111540	TMEM230	H45R	Known
20	37519161	BLCAP	Q5R	Known
20	45838283	SNX21	M155V	Known
22	22322881	IGLV1-51	T89A	Known
22	22376266	IGLV5-45	C44R	Novel
22	22721088	IGLV3-19	T94A	Known
X	315276	GTPBP6	I171V	Novel
