# Supplementary material for: Genome-Wide Characterization of RNA Editing Sites in Primary Gastric Adenocarcinoma through RNA-seq Data Analysis
Source: Int J Genomics. 2020 Dec 18;2020:6493963. doi: 10.1155/2020/6493963 (PMC7768588; doi:10.1155/2020/6493963)
Supplement: Supplementary 4 — Editing events with non-sense-mediated decay impact. [file 6493963.f4.txt]

Chromosome	Position	Gene_name	Specificity
1	43994381	CCDC24	Cancer-specific
1	43994515	CCDC24	Cancer-specific
1	89020203	GBP3	Common
1	193092686	GLRX2	Cancer-specific
1	148102797	NBPF11	Normal-specific
1	148102733	NBPF11	Common
1	148102644	NBPF11	Common
1	39747956	PPIE	Common
1	39748476	PPIE	Common
1	39748589	PPIE	Common
1	39748555	PPIE	Common
1	99974997	SLC35A3	Cancer-specific
1	99975018	SLC35A3	Common
2	241324457	SEPT2	Normal-specific
2	99313522	AC079447.1	Cancer-specific
2	99204240	AC079447.1	Cancer-specific
2	99204321	AC079447.1	Cancer-specific
2	223754096	AP1S3	Cancer-specific
2	223753325	AP1S3	Cancer-specific
2	223756311	AP1S3	Cancer-specific
2	223756290	AP1S3	Cancer-specific
2	223756285	AP1S3	Cancer-specific
2	223756095	AP1S3	Cancer-specific
2	223757127	AP1S3	Cancer-specific
2	223757114	AP1S3	Cancer-specific
2	223755659	AP1S3	Normal-specific
2	223755655	AP1S3	Normal-specific
2	223754872	AP1S3	Normal-specific
2	223754665	AP1S3	Normal-specific
2	223757292	AP1S3	Normal-specific
2	223754129	AP1S3	Common
2	223753993	AP1S3	Common
2	223756122	AP1S3	Common
2	223757354	AP1S3	Common
2	223754744	AP1S3	Common
2	223753384	AP1S3	Common
2	223756253	AP1S3	Common
2	223756225	AP1S3	Common
2	223755695	AP1S3	Common
2	223756298	AP1S3	Common
2	223756094	AP1S3	Common
2	223756172	AP1S3	Common
2	223755707	AP1S3	Common
2	61142794	C2orf74	Normal-specific
2	61142687	C2orf74	Normal-specific
2	61141913	C2orf74	Normal-specific
2	61142102	C2orf74	Common
2	203302473	CYP20A1	Normal-specific
2	203302721	CYP20A1	Normal-specific
2	203303062	CYP20A1	Normal-specific
2	203303279	CYP20A1	Common
2	8722807	KIDINS220	Normal-specific
2	8722799	KIDINS220	Normal-specific
2	8722776	KIDINS220	Normal-specific
2	99196557	MRPL30	Common
2	3545047	RNASEH1	Cancer-specific
2	3545048	RNASEH1	Common
2	101271398	RNF149	Normal-specific
2	130159569	SMPD4	Normal-specific
2	130159594	SMPD4	Common
3	53070198	AC096887.1	Normal-specific
3	121832599	EAF2	Normal-specific
3	142185331	GK5	Cancer-specific
3	142185201	GK5	Cancer-specific
3	142185399	GK5	Normal-specific
3	142185240	GK5	Normal-specific
3	142185156	GK5	Normal-specific
3	142184720	GK5	Common
3	142184753	GK5	Common
3	142184829	GK5	Common
3	195744363	MUC4	Common
3	170131798	PHC3	Cancer-specific
3	170131668	PHC3	Cancer-specific
3	169991355	SEC62	Cancer-specific
3	194589117	TMEM44	Normal-specific
3	194589103	TMEM44	Normal-specific
3	9818575	TTLL3	Common
3	49008943	WDR6	Normal-specific
4	51887241	DCUN1D4	Normal-specific
4	1892221	NSD2	Normal-specific
4	40456806	RBM47	Cancer-specific
4	39532772	UGDH	Normal-specific
5	43377286	CCL28	Cancer-specific
5	43377473	CCL28	Normal-specific
5	43377383	CCL28	Normal-specific
5	43377440	CCL28	Normal-specific
5	313768	PDCD6	Cancer-specific
5	312731	PDCD6	Normal-specific
5	312689	PDCD6	Common
6	26278479	HIST1H4H	Cancer-specific
6	26278373	HIST1H4H	Normal-specific
6	26278268	HIST1H4H	Normal-specific
6	26278328	HIST1H4H	Common
6	31765193	MSH5-SAPCD1	Normal-specific
6	31765356	MSH5-SAPCD1	Normal-specific
6	31765363	MSH5-SAPCD1	Normal-specific
6	31764993	MSH5-SAPCD1	Normal-specific
6	31765030	MSH5-SAPCD1	Normal-specific
6	31765035	MSH5-SAPCD1	Normal-specific
6	31765194	MSH5-SAPCD1	Common
6	31765071	MSH5-SAPCD1	Common
6	31765181	MSH5-SAPCD1	Common
6	31765430	MSH5-SAPCD1	Common
6	170567404	TBP	Cancer-specific
7	66715783	AC027644.4	Cancer-specific
7	66716803	AC027644.4	Cancer-specific
7	66685422	AC027644.4	Cancer-specific
7	66716494	AC027644.4	Cancer-specific
7	66716542	AC027644.4	Common
7	66715788	AC027644.4	Common
7	100212862	CASTOR3	Cancer-specific
7	100212733	CASTOR3	Cancer-specific
7	100212816	CASTOR3	Normal-specific
7	100212870	CASTOR3	Common
7	100212732	CASTOR3	Common
7	44574723	DDX56	Common
7	44574698	DDX56	Common
7	87162291	DMTF1	Cancer-specific
7	87162219	DMTF1	Cancer-specific
7	87162186	DMTF1	Cancer-specific
7	1535393	MAFK	Common
7	1535464	MAFK	Common
7	102545409	POLR2J3	Normal-specific
7	66681007	RABGEF1	Cancer-specific
7	66681663	RABGEF1	Cancer-specific
7	66740059	RABGEF1	Common
7	66740100	RABGEF1	Common
7	48106411	UPP1	Cancer-specific
7	48106573	UPP1	Cancer-specific
7	48106586	UPP1	Common
8	120058688	COL14A1	Normal-specific
8	120055787	COL14A1	Normal-specific
8	120055712	COL14A1	Normal-specific
8	120055209	COL14A1	Normal-specific
8	120055789	COL14A1	Normal-specific
8	120055108	COL14A1	Normal-specific
8	120055091	COL14A1	Normal-specific
8	120055797	COL14A1	Common
8	120055176	COL14A1	Common
8	120055727	COL14A1	Common
8	120055921	COL14A1	Common
8	120055728	COL14A1	Common
8	120054977	COL14A1	Common
8	120055141	COL14A1	Common
8	120055032	COL14A1	Common
8	67044167	COPS5	Cancer-specific
8	67044273	COPS5	Normal-specific
8	22592953	PDLIM2	Normal-specific
8	11106702	XKR6	Common
8	144809307	ZNF517	Cancer-specific
8	144809291	ZNF517	Normal-specific
8	144809329	ZNF517	Normal-specific
8	144809303	ZNF517	Normal-specific
8	144809247	ZNF517	Common
9	65707139	CBWD5	Normal-specific
9	93448441	FAM120AOS	Common
9	96891696	MFSD14C	Cancer-specific
9	96891645	MFSD14C	Cancer-specific
9	96891622	MFSD14C	Cancer-specific
9	96891108	MFSD14C	Cancer-specific
9	96891096	MFSD14C	Normal-specific
9	68948546	PIP5K1B	Cancer-specific
9	111563638	PTGR1	Normal-specific
10	100233079	CWF19L1	Normal-specific
10	100232510	CWF19L1	Normal-specific
10	100232551	CWF19L1	Normal-specific
10	100232926	CWF19L1	Common
10	100232668	CWF19L1	Common
10	100232550	CWF19L1	Common
10	100233036	CWF19L1	Common
10	100233053	CWF19L1	Common
10	49973505	TIMM23B	Normal-specific
10	49974002	TIMM23B	Normal-specific
10	49973999	TIMM23B	Common
10	49973602	TIMM23B	Common
10	49973494	TIMM23B	Common
11	119001801	CCDC84	Cancer-specific
11	86911942	PRSS23	Normal-specific
11	86912072	PRSS23	Normal-specific
11	86910838	PRSS23	Normal-specific
11	93743210	TAF1D	Normal-specific
11	66520937	ZDHHC24	Normal-specific
11	66520807	ZDHHC24	Common
12	53296435	PFDN5	Common
13	45030505	GPALPP1	Cancer-specific
13	45030874	GPALPP1	Cancer-specific
13	45030936	GPALPP1	Cancer-specific
13	45030618	GPALPP1	Normal-specific
13	45031113	GPALPP1	Normal-specific
13	45030449	GPALPP1	Common
13	45030546	GPALPP1	Common
13	45031009	GPALPP1	Common
13	45030433	GPALPP1	Common
14	35274260	AL121594.1	Cancer-specific
14	31393449	AL139353.1	Cancer-specific
14	105454957	TEX22	Cancer-specific
15	40530047	CCDC32	Common
15	63910785	DAPK2	Cancer-specific
15	63910643	DAPK2	Cancer-specific
15	63911156	DAPK2	Normal-specific
15	63909739	DAPK2	Normal-specific
15	63910790	DAPK2	Normal-specific
15	63910974	DAPK2	Common
15	63910791	DAPK2	Common
15	63911119	DAPK2	Common
15	75351324	NEIL1	Normal-specific
15	75351340	NEIL1	Normal-specific
15	64140837	SNX1	Cancer-specific
15	64142243	SNX1	Cancer-specific
15	64140819	SNX1	Normal-specific
15	64142174	SNX1	Normal-specific
15	64142130	SNX1	Normal-specific
15	64140645	SNX1	Common
16	75599337	ADAT1	Normal-specific
16	89687689	CDK10	Cancer-specific
16	89687690	CDK10	Common
16	89687615	CDK10	Common
16	89687638	CDK10	Common
16	89687702	CDK10	Common
16	23709254	ERN2	Common
16	23709174	ERN2	Common
16	88660818	MVD	Normal-specific
16	4462629	NMRAL1	Cancer-specific
16	4462465	NMRAL1	Cancer-specific
16	4462421	NMRAL1	Cancer-specific
16	4462350	NMRAL1	Normal-specific
16	4462795	NMRAL1	Normal-specific
16	4463141	NMRAL1	Common
16	4462356	NMRAL1	Common
16	4462809	NMRAL1	Common
16	4462261	NMRAL1	Common
16	4462244	NMRAL1	Common
16	89549430	SPG7	Cancer-specific
16	89539784	SPG7	Normal-specific
16	89549574	SPG7	Normal-specific
17	60166377	CA4	Cancer-specific
17	82428102	HEXDC	Normal-specific
17	59204152	PRR11	Cancer-specific
17	15986830	ZSWIM7	Normal-specific
19	4528451	AC011498.4	Normal-specific
19	1032835	CNN2	Common
19	17552486	FAM129C	Cancer-specific
19	17552104	FAM129C	Normal-specific
19	17552159	FAM129C	Normal-specific
19	17552456	FAM129C	Normal-specific
19	17552653	FAM129C	Normal-specific
19	17552990	FAM129C	Normal-specific
19	17552995	FAM129C	Normal-specific
19	17552438	FAM129C	Common
19	49521728	FCGRT	Common
19	16156092	HSH2D	Normal-specific
19	16155701	HSH2D	Normal-specific
19	35769830	PROSER3	Normal-specific
19	35769831	PROSER3	Normal-specific
19	35769568	PROSER3	Common
19	35769860	PROSER3	Common
19	35769513	PROSER3	Common
19	55041252	RDH13	Cancer-specific
19	55039344	RDH13	Cancer-specific
19	55039343	RDH13	Normal-specific
19	55039436	RDH13	Common
19	55039287	RDH13	Common
19	55041258	RDH13	Common
19	55039275	RDH13	Common
19	16631220	SMIM7	Cancer-specific
19	16645759	SMIM7	Normal-specific
19	16645760	SMIM7	Normal-specific
19	12246133	ZNF44	Normal-specific
19	12246128	ZNF44	Normal-specific
19	12245851	ZNF44	Normal-specific
19	12245760	ZNF44	Normal-specific
19	12246208	ZNF44	Normal-specific
19	12246202	ZNF44	Normal-specific
19	19791733	ZNF506	Normal-specific
19	19792444	ZNF506	Normal-specific
19	19791714	ZNF506	Common
19	52702626	ZNF611	Cancer-specific
19	52700402	ZNF611	Cancer-specific
19	52699972	ZNF611	Cancer-specific
19	52702466	ZNF611	Cancer-specific
19	52702241	ZNF611	Cancer-specific
19	52704051	ZNF611	Cancer-specific
19	52703380	ZNF611	Cancer-specific
19	52703379	ZNF611	Cancer-specific
19	52700253	ZNF611	Common
19	52702547	ZNF611	Common
19	52563377	ZNF808	Cancer-specific
19	52563394	ZNF808	Cancer-specific
19	52563849	ZNF808	Cancer-specific
19	52563876	ZNF808	Cancer-specific
19	52618646	ZNF83	Common
21	33434297	IFNGR2	Normal-specific
21	33434447	IFNGR2	Normal-specific
21	33432979	IFNGR2	Normal-specific
